# Supplementary material for: Investigation of Cytotoxicity and Cell Uptake of Cationic Beta-Cyclodextrins as Valid Tools in Nasal Delivery
Source: PubMed Central journal article supplement (PMC7407921; doi:10.3390/pharmaceutics12070658), 2020-07-12
Supplement: pharmaceutics-12-00658-s001.pdf [file pharmaceutics-12-00658-s001.pdf]

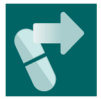

# Supplementary Materials: Investigation of Cytotoxicity and Cell Uptake of Cationic Beta-Cyclodextrins as Valid Tools in Nasal Delivery

Giovanna Rassu, Silvia Fancello, Marta Roldo, Milo Malanga, Lajos Szente, Rossana Migheli \*, Elisabetta Gavini \* and Paolo Giunchedi

Table S1. Description of beta-cyclodextrin monomers and polymers studied in this work.

| Not Fluorescent                                                                         |          |                 |                 |                  |                 | Analogue fluorescent cyclodextrin    |                                                                                                                   |                                         |                                    |                 |                  |                 |
|-----------------------------------------------------------------------------------------|----------|-----------------|-----------------|------------------|-----------------|--------------------------------------|-------------------------------------------------------------------------------------------------------------------|-----------------------------------------|------------------------------------|-----------------|------------------|-----------------|
| Cyclodextrin                                                                            | Code     | DS <sup>1</sup> | MW <sup>2</sup> | CLR <sub>3</sub> | CD <sup>4</sup> | Description                          | Cyclodextrin                                                                                                      | Code                                    | DS <sup>1</sup>                    | MW <sup>2</sup> | CLR <sub>3</sub> | CD <sup>4</sup> |
| (2-Hydroxy-3-N,N,N-trimethylamino) propyl-beta- cyclodextrin chloride                   | QA       | 3               | 1589.8          | -                | 3               | cationic monomer; purity > 99%       | Quaternary ammonium-6-deoxy- 6-[(5/6)-rhodaminyl thioureido]-(2-Hydroxy-3-N,N,N-trimethylamino)-beta-cyclodextrin | <b>RBIT</b><br><b>C-Q</b><br><b>A</b>   | 4.5<br>(QA)<br>1<br>(RBIT<br>C)    | 1939.<br>86     | -                | 3.5             |
| Quaternary-ammonium-beta- cyclodextrin soluble polymer crosslinked with epichlorohydrin | QAP<br>S | 2.2             | 40,000          | ~11              | 2.2             | cationic polymer; CD content: 50-70% | Quaternary-ammonium-rhodamine labeled beta-cyclodextrin soluble polymer crosslinked with epichlorohydrin          | <b>RBIT</b><br><b>C-Q</b><br><b>APS</b> | 2.2<br>(QA)<br>0.05<br>(RBIT<br>C) | 40,000<br>0     | ~11              | 2.2             |
| Heptakis (6-deoxy-6-amino)-beta-cyclodextrin heptahydrochloride                         | HA       | -               | 1383.3          | -                | 7               | cationic monomer; purity > 98%       |                                                                                                                   |                                         |                                    |                 |                  |                 |
| Soluble amino-beta-cyclodextrin polymer crosslinked with epichlorohydrin                | HAP<br>S | 1               | 25,000          | ~10              | 1               | cationic polymer; CD content: 70%    |                                                                                                                   |                                         |                                    |                 |                  |                 |
| (2-Hydroxypropyl)- beta-cyclodextrin                                                    | HP       | 4.5             | 1400            | -                | -               | control monomer                      | 6-deoxy-6-[(5/6)-rhodaminy lthioureido]-hydroxypropyl-beta-cyclodextrin                                           | <b>RBIT</b><br><b>C-H</b><br><b>P</b>   | 4.7<br>(HP)<br>0.5<br>(RBIT<br>C)  | 1675.<br>07     |                  | 1*              |
| Soluble β-cyclodextrin polymer crosslinked with epichlorohydrin                         | PS       | -               | 92,000          | ~11              | -               | control polymer; CD content: 70%     | Rhodamine labeled BCD soluble polymer crosslinked with epichlorohydrin                                            | <b>RBIT</b><br><b>C-PS</b>              | 0.05<br>(RBIT<br>C)                | 100,000         | ~11              | -               |

<sup>1</sup>DS: Average Degree of Substitution; <sup>2</sup>MW: Average Molecular Weight (g/mol); <sup>3</sup>CLR: Cross-Linking Ratio (mol epichlorohydrin/mol CD); <sup>4</sup>CD: Cationic Density (cationic groups per cyclodextrin unit). \* anionic group per cyclodextrin unit

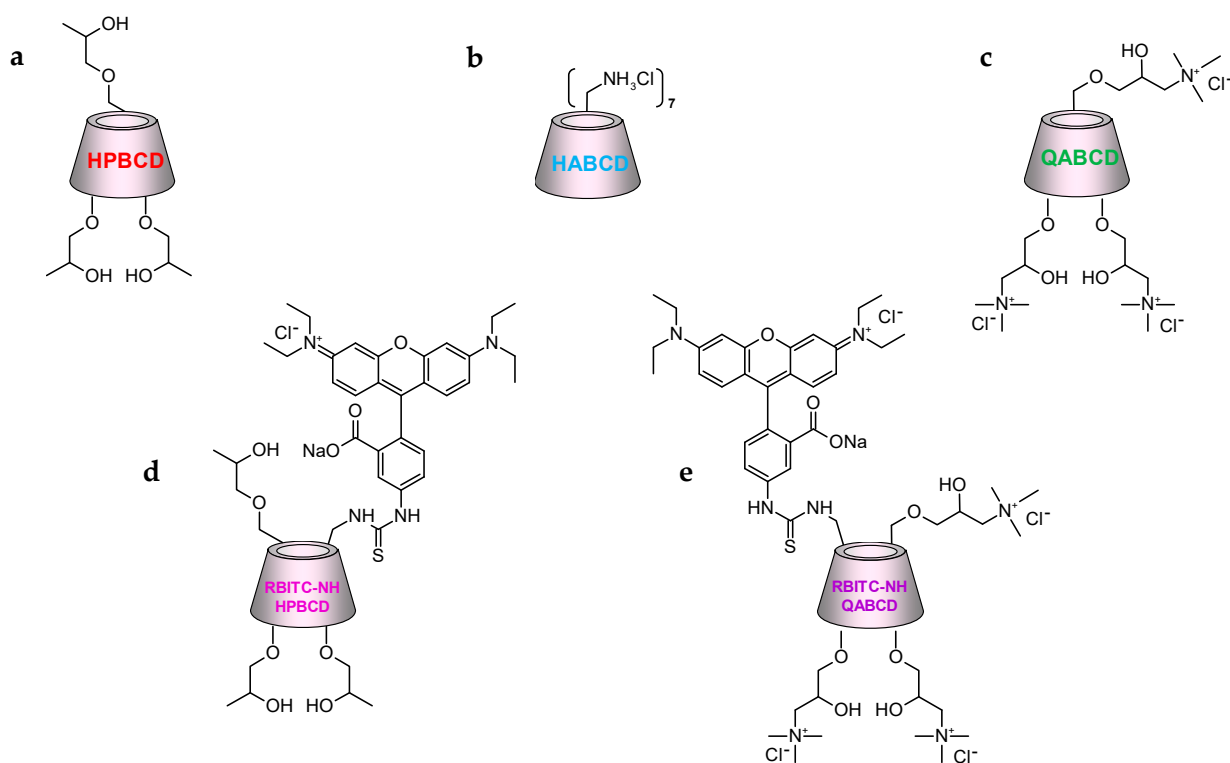

**Figure S1.** Cartoon representations for beta-cyclodextrin monomers: (a) HP; (b) HA; (c) QA; (d) RBITC-HP; (e) RBITC-QA.

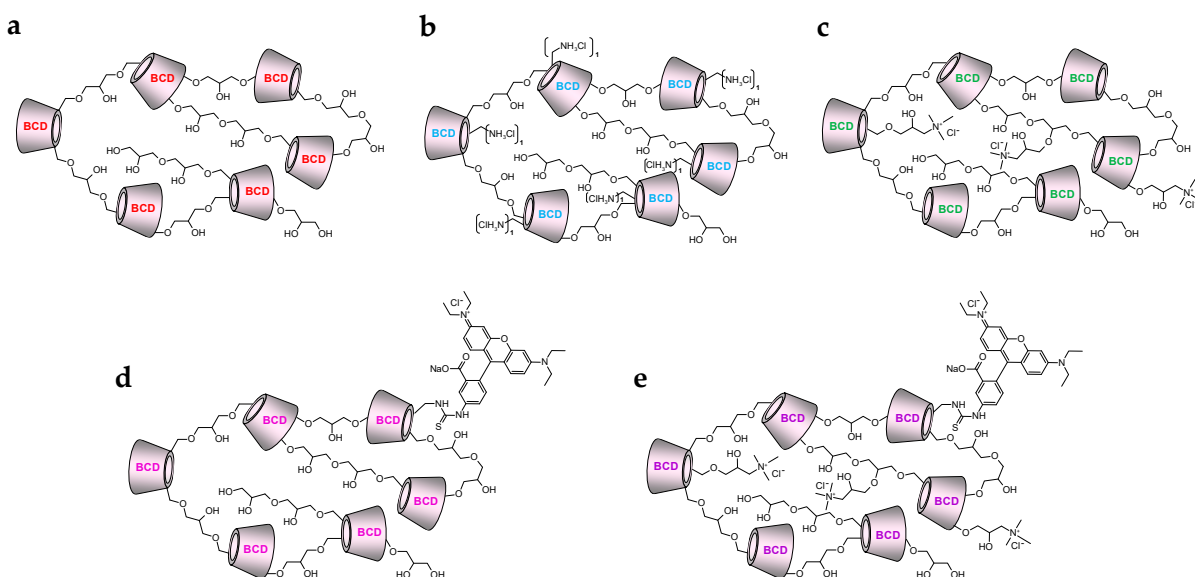

**Figure S2.** Cartoon representations for beta-cyclodextrin polymers: (a) PS; (b) HAPS; (c) QAPS; (d) RBITC-PS; (e) RBITC-QAPS.

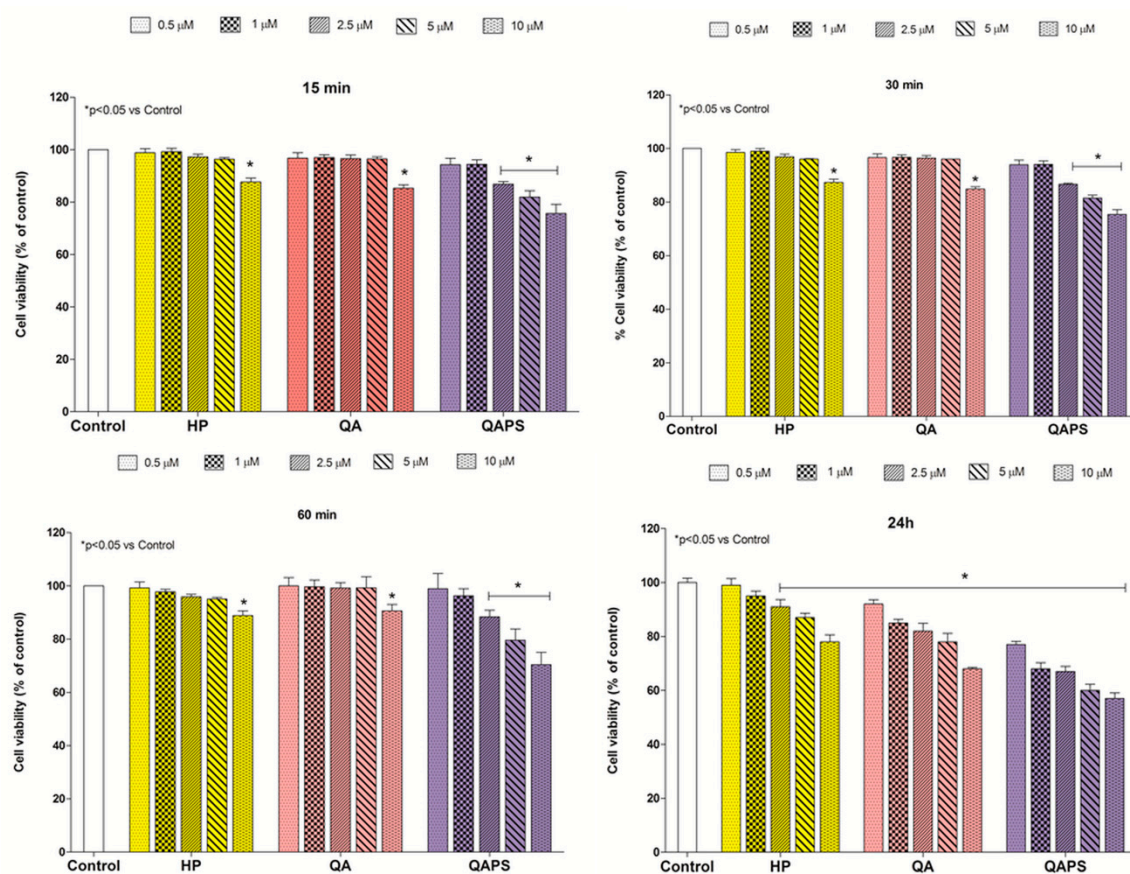

**Figure S3.** Effect of different concentrations (0.5 - 1 - 2.5 - 5 - 10 μM) of HP, QA and QAPS on PC12 cell viability at increasing times of exposure (15, 30, 60 min and 24h). \* $p < 0.05$  vs Control.

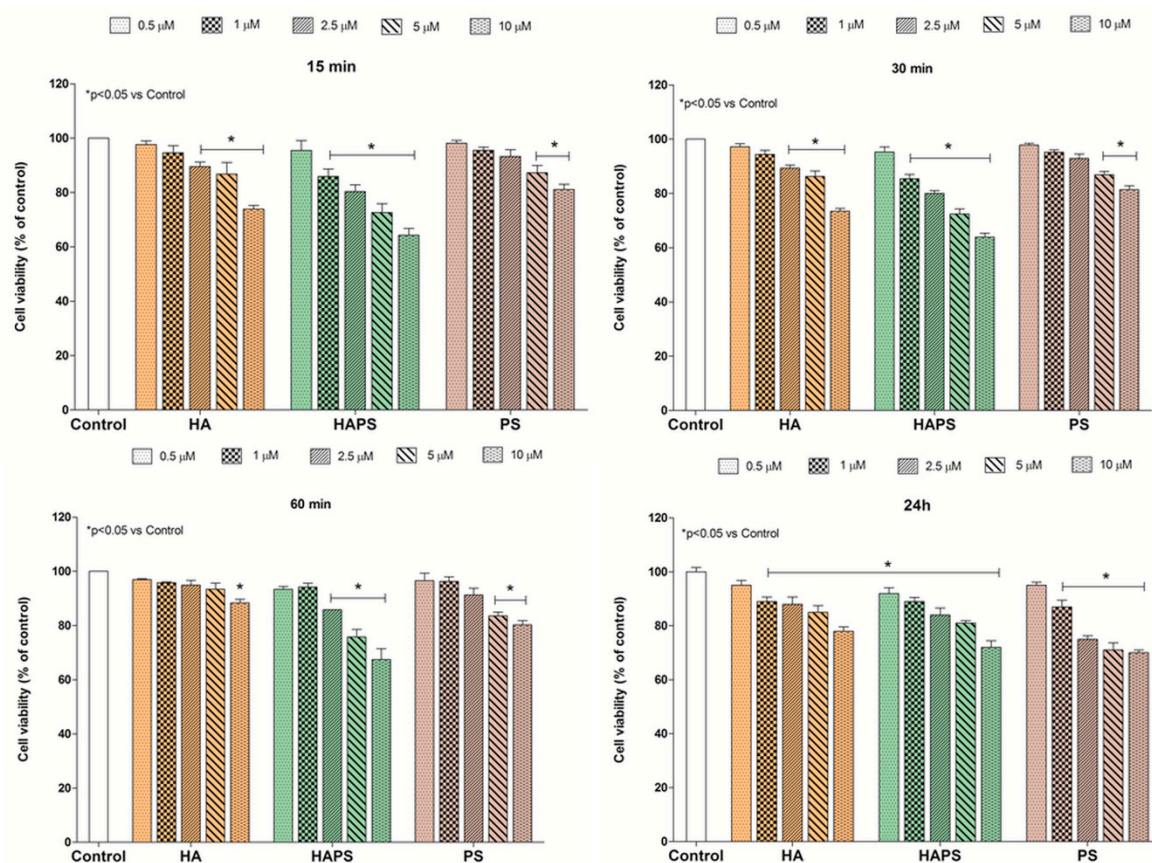

**Figure S4.** Effect of different concentrations (0.5 - 1 - 2.5 - 5 - 10 μM) of HA, HAPS and PS on PC12 cell viability at increasing times of exposure (15, 30, 60 min and 24h).  $*p < 0.05$  vs Control.

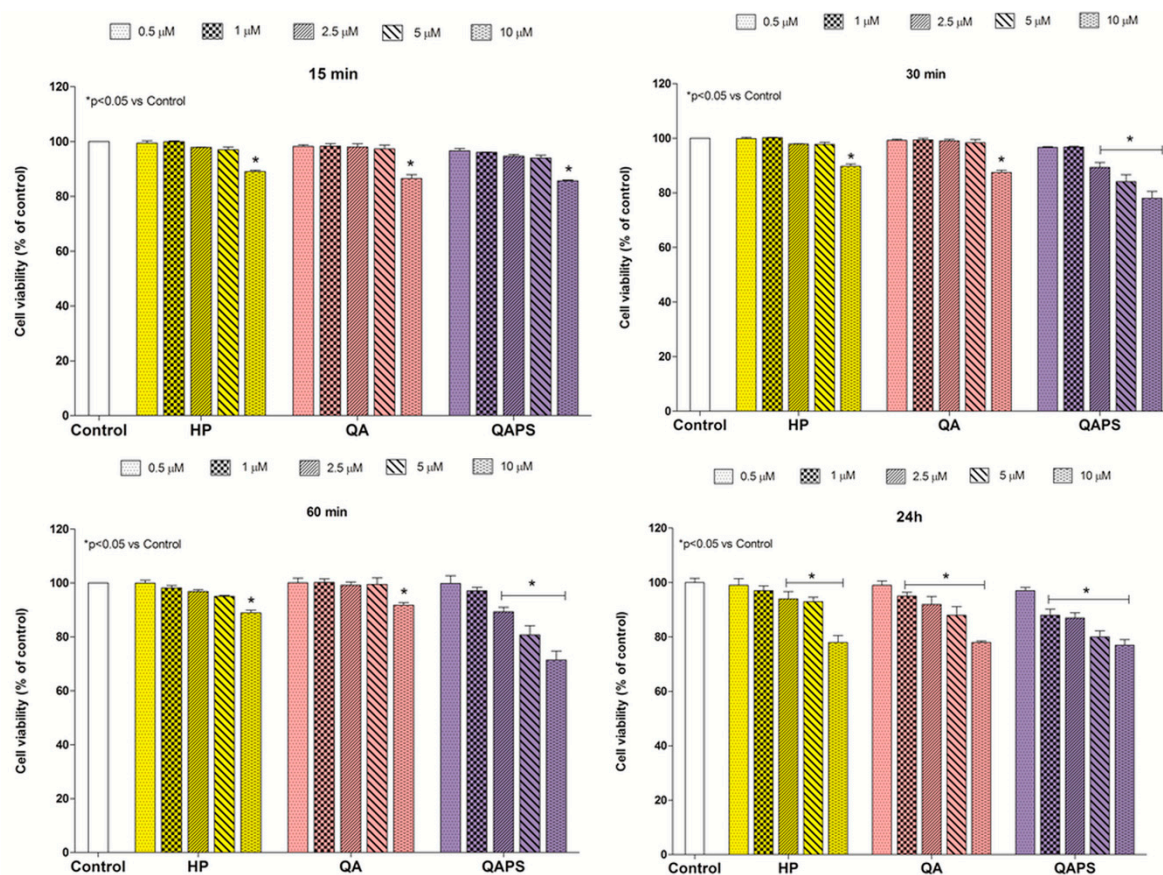

**Figure S5.** Effect of different concentrations (0.5 - 1 - 2.5 - 5 - 10 μM) of HP, QA and QAPS on CACO-2 cell viability at increasing times of exposure (15, 30, 60 min and 24h). \* $p < 0.05$  vs Control.

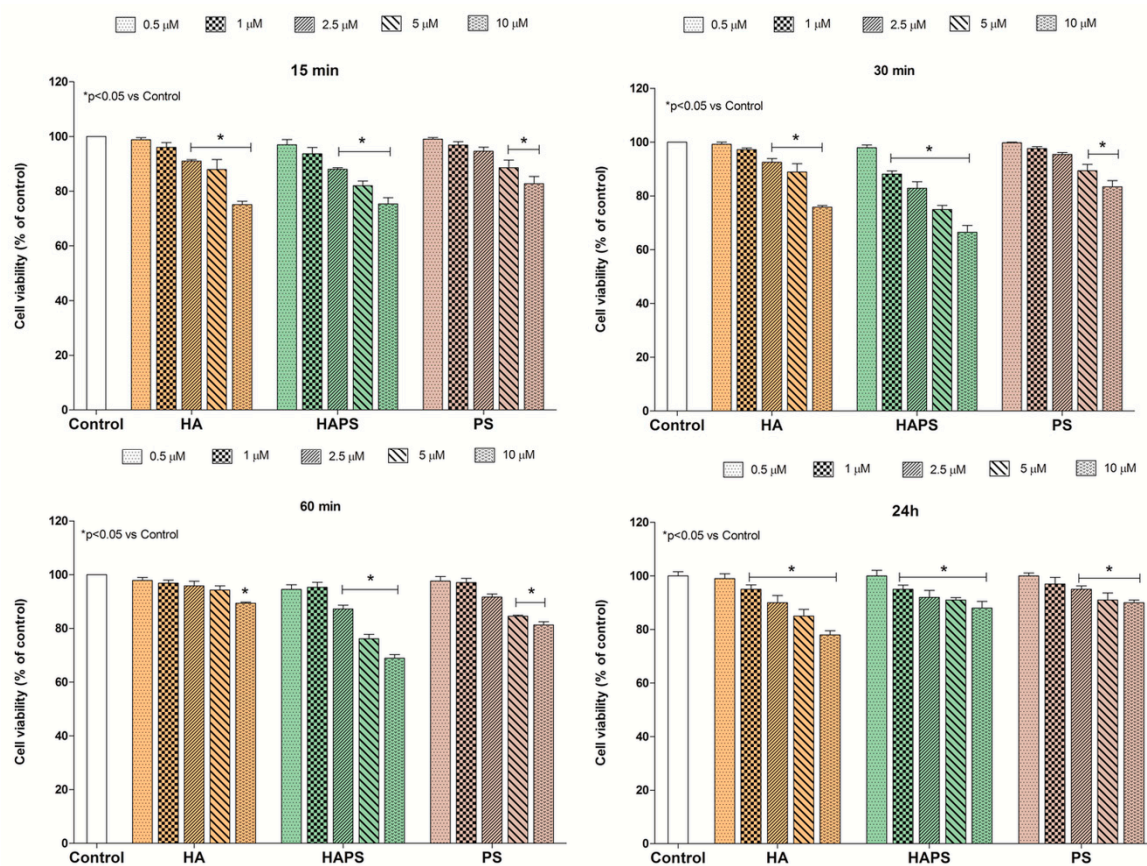

**Figure S6.** Effect of different concentrations (0.5 - 1 - 2.5 - 5 - 10 μM) of HA, HAPS and PS on CACO-2 cell viability at increasing times of exposure (15, 30, 60 min and 24h). \* $p < 0.05$  vs Control.
